# Supplementary material for: A Short Antisense Oligonucleotide Ameliorates Symptoms of Severe Mouse Models of Spinal Muscular Atrophy
Source: PubMed Central journal article supplement — Mol Ther Nucleic Acids. 2014 Jul 8;3(7):e174–. doi: 10.1038/mtna.2014.23 (PMC4121513; doi:10.1038/mtna.2014.23), 2014-07-08
Supplement: mtna201423x1.pdf [file mtna201423x1.pdf]

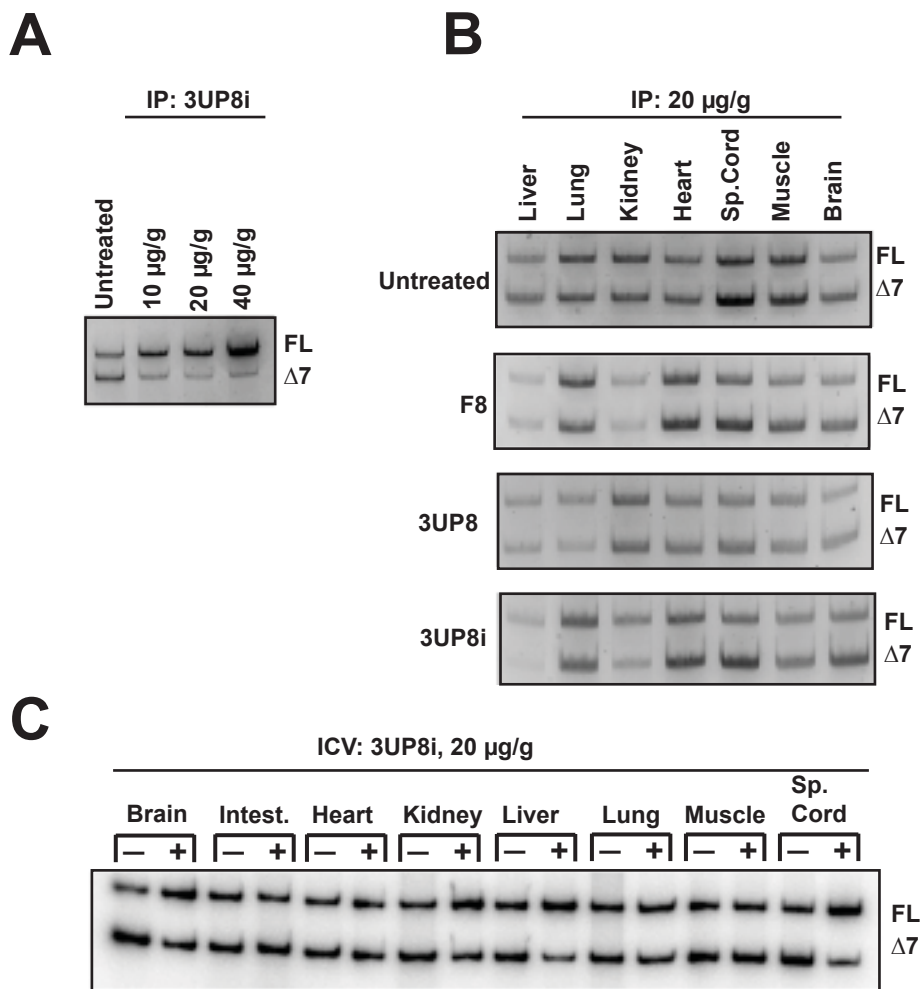

**Figure S1** Effect of 3UP8i treatment on splicing of *SMN2* in vivo. **(a)** Splicing of endogenous *SMN2* exon 7 in liver. Various ASOs were administrated through IP injection at 10, 20, and 40 µg/g body weight, daily for three days. Tissues were harvested for analysis 24 hours after the third injection. **(b)** Splicing of endogenous *SMN2* exon 7 following IP administration. Animals received injections daily for three days. Tissues were harvested for analysis 24 hours after the third injection. **(c)** Splicing of endogenous *SMN2* exon 7 following ICV administration. Animals received injections daily for three days. Tissues were harvested for analysis 24 hours after the third injection.
