# Supplementary material for: A Short Antisense Oligonucleotide Ameliorates Symptoms of Severe Mouse Models of Spinal Muscular Atrophy
Source: PubMed Central journal article supplement — Mol Ther Nucleic Acids. 2014 Jul 8;3(7):e174–. doi: 10.1038/mtna.2014.23 (PMC4121513; doi:10.1038/mtna.2014.23), 2014-07-08
Supplement: mtna201423x2.pdf [file mtna201423x2.pdf]

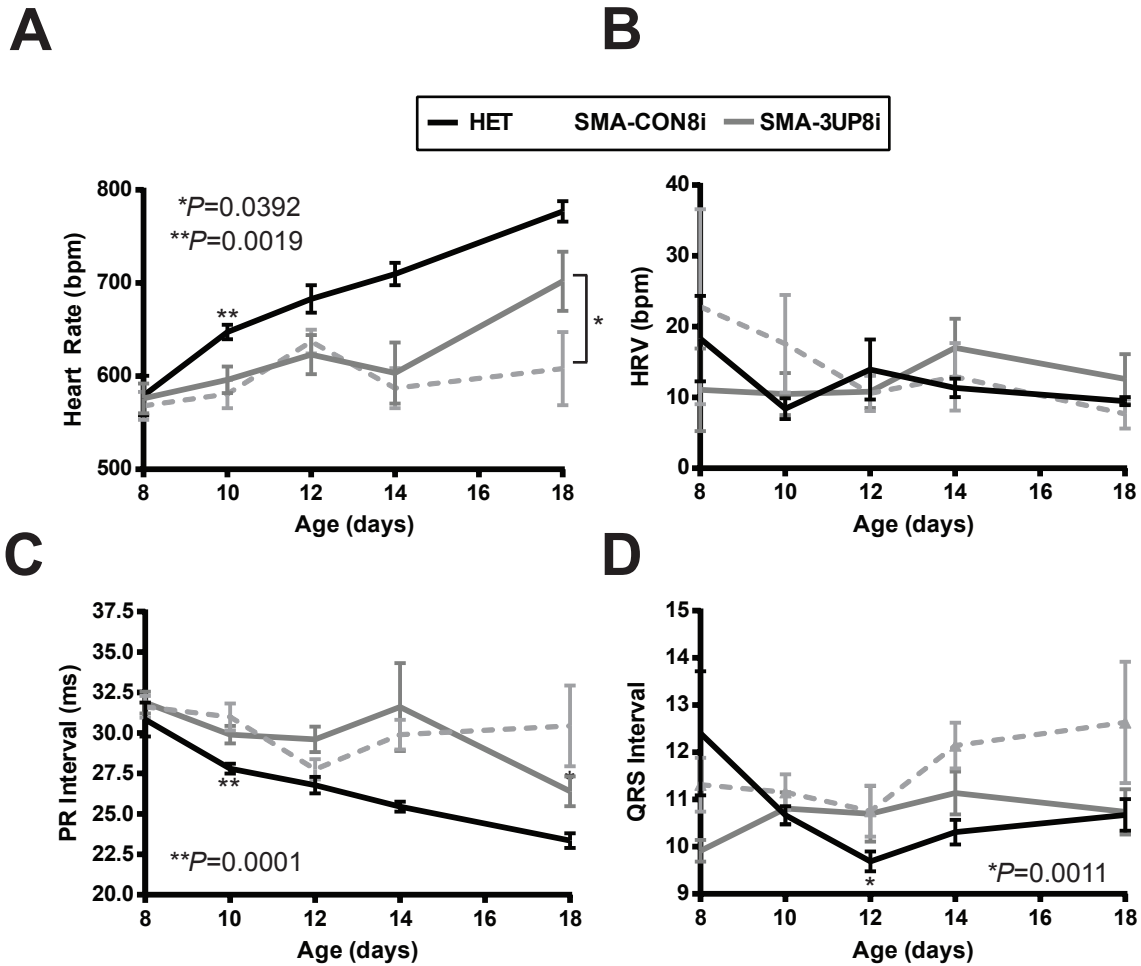

**Figure S2** 3UP8 improves cardiac deficits in Hemi-hybrid SMA mice. SMA mice ( $SMN2^{tg/o}; Snn^{tm1Hung/tm1.1Jme}$ ) treated with at P0, P5, and P10 with 3UP8i or mismatch control (CON8i) at 80  $\mu\text{g/g}$  body weight. Resting ECG recordings from P8 to P18 from conscious, unrestrained animals (3UP8i,  $n=10$ ; CON8i,  $n=11$ ; HET,  $n=16$ ). All values are presented as mean  $\pm$  SEM. Statistical analysis performed by Student's  $t$ -test with  $P$  values indicated in the graphs. (a) Heart Rate. (b) Heart Rate Variability (HRV). (c) PR Interval. (d) QRS Interval.
