# Supplementary material for: A Short Antisense Oligonucleotide Ameliorates Symptoms of Severe Mouse Models of Spinal Muscular Atrophy
Source: PubMed Central journal article supplement — Mol Ther Nucleic Acids. 2014 Jul 8;3(7):e174–. doi: 10.1038/mtna.2014.23 (PMC4121513; doi:10.1038/mtna.2014.23), 2014-07-08
Supplement: mtna201423x3.pdf [file mtna201423x3.pdf]

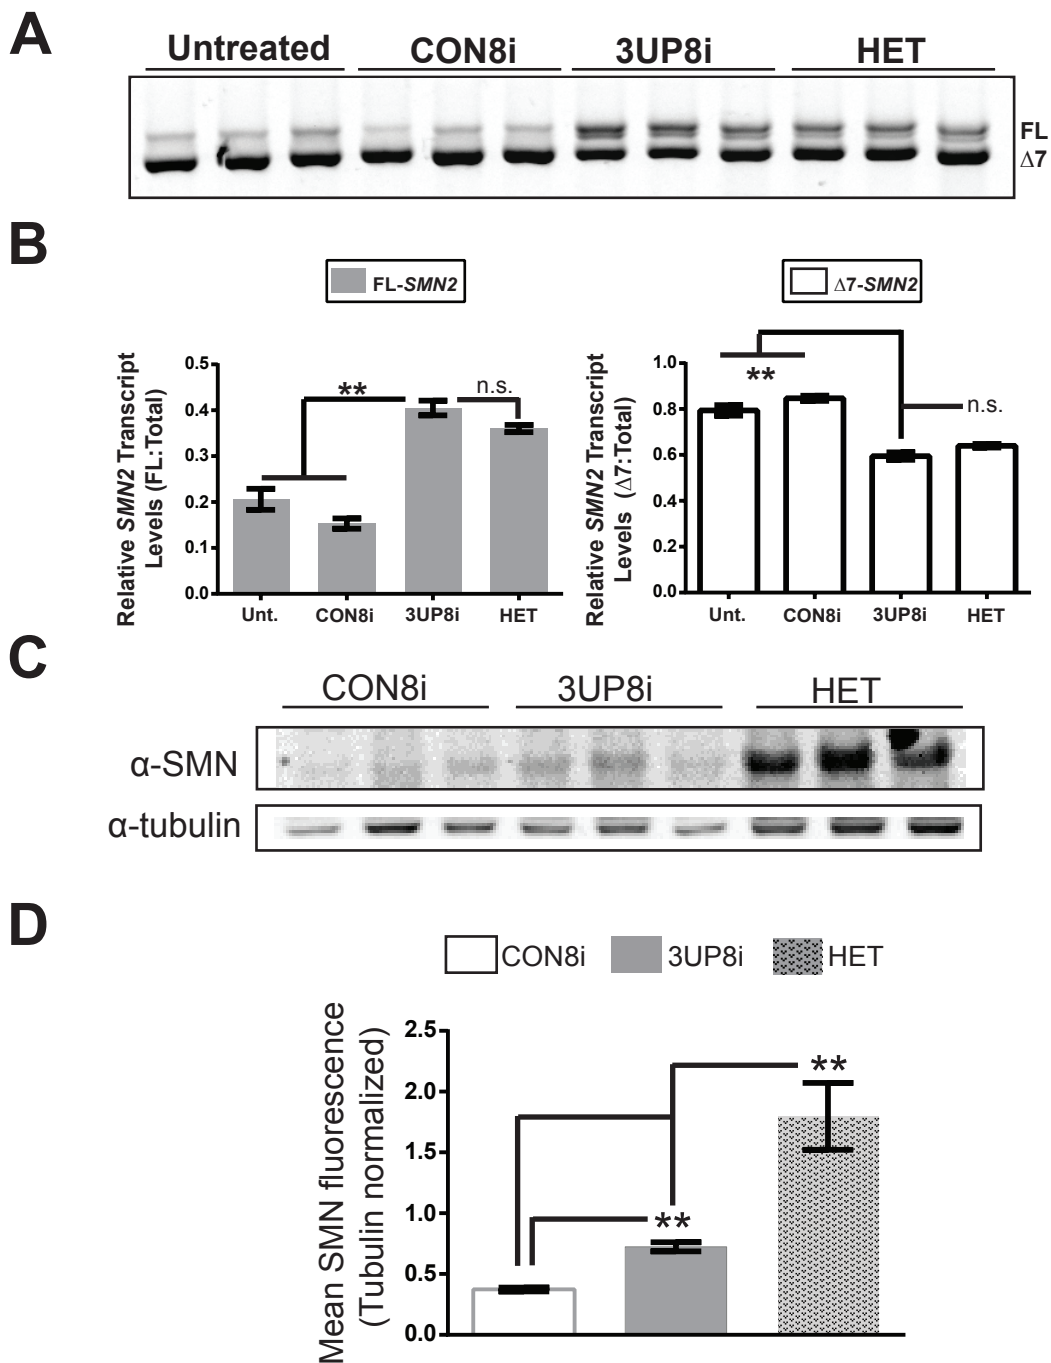

**Figure S3** 3UP8i increases FL-*SMN2* levels in skeletal muscle of Hemi-hybrid SMA mice. (*SMN2*<sup>tg/o</sup>; *Smn*<sup>tm1Hung/tm1.1Jme</sup>) were administered three doses (80  $\mu$ g/g body weight at P0, P5, P10) of 3UP8i or mismatch control (CON8i) by intraperitoneal (IP) injection. **(a)** *SMN2* exon-7 inclusion. Quadriceps muscle was harvested at P12 and analyzed via endpoint RT-PCR for full-length FL-*SMN2* and  $\Delta$ 7-*SMN2*. **(b)** FL- and  $\Delta$ 7-*SMN2* levels were plotted as ratio to total *SMN2* levels. Data presented as mean  $\pm$  SEM. (n=3). Student's *t*-test, \*\**P*<0.01 (FL). **(c)** Quadriceps muscle was harvested at P12, and subjected to immunoblot with  $\alpha$ -SMN and  $\alpha$ -tubulin antibodies. **(d)** SMN levels were normalized to  $\beta$ -tubulin. Data presented as mean  $\pm$  SEM. (n=3). Student's *t*-test, \*\**P*<0.01.
