# Supplementary material for: A Short Antisense Oligonucleotide Ameliorates Symptoms of Severe Mouse Models of Spinal Muscular Atrophy
Source: PubMed Central journal article supplement — Mol Ther Nucleic Acids. 2014 Jul 8;3(7):e174–. doi: 10.1038/mtna.2014.23 (PMC4121513; doi:10.1038/mtna.2014.23), 2014-07-08
Supplement: mtna201423x4.pdf [file mtna201423x4.pdf]

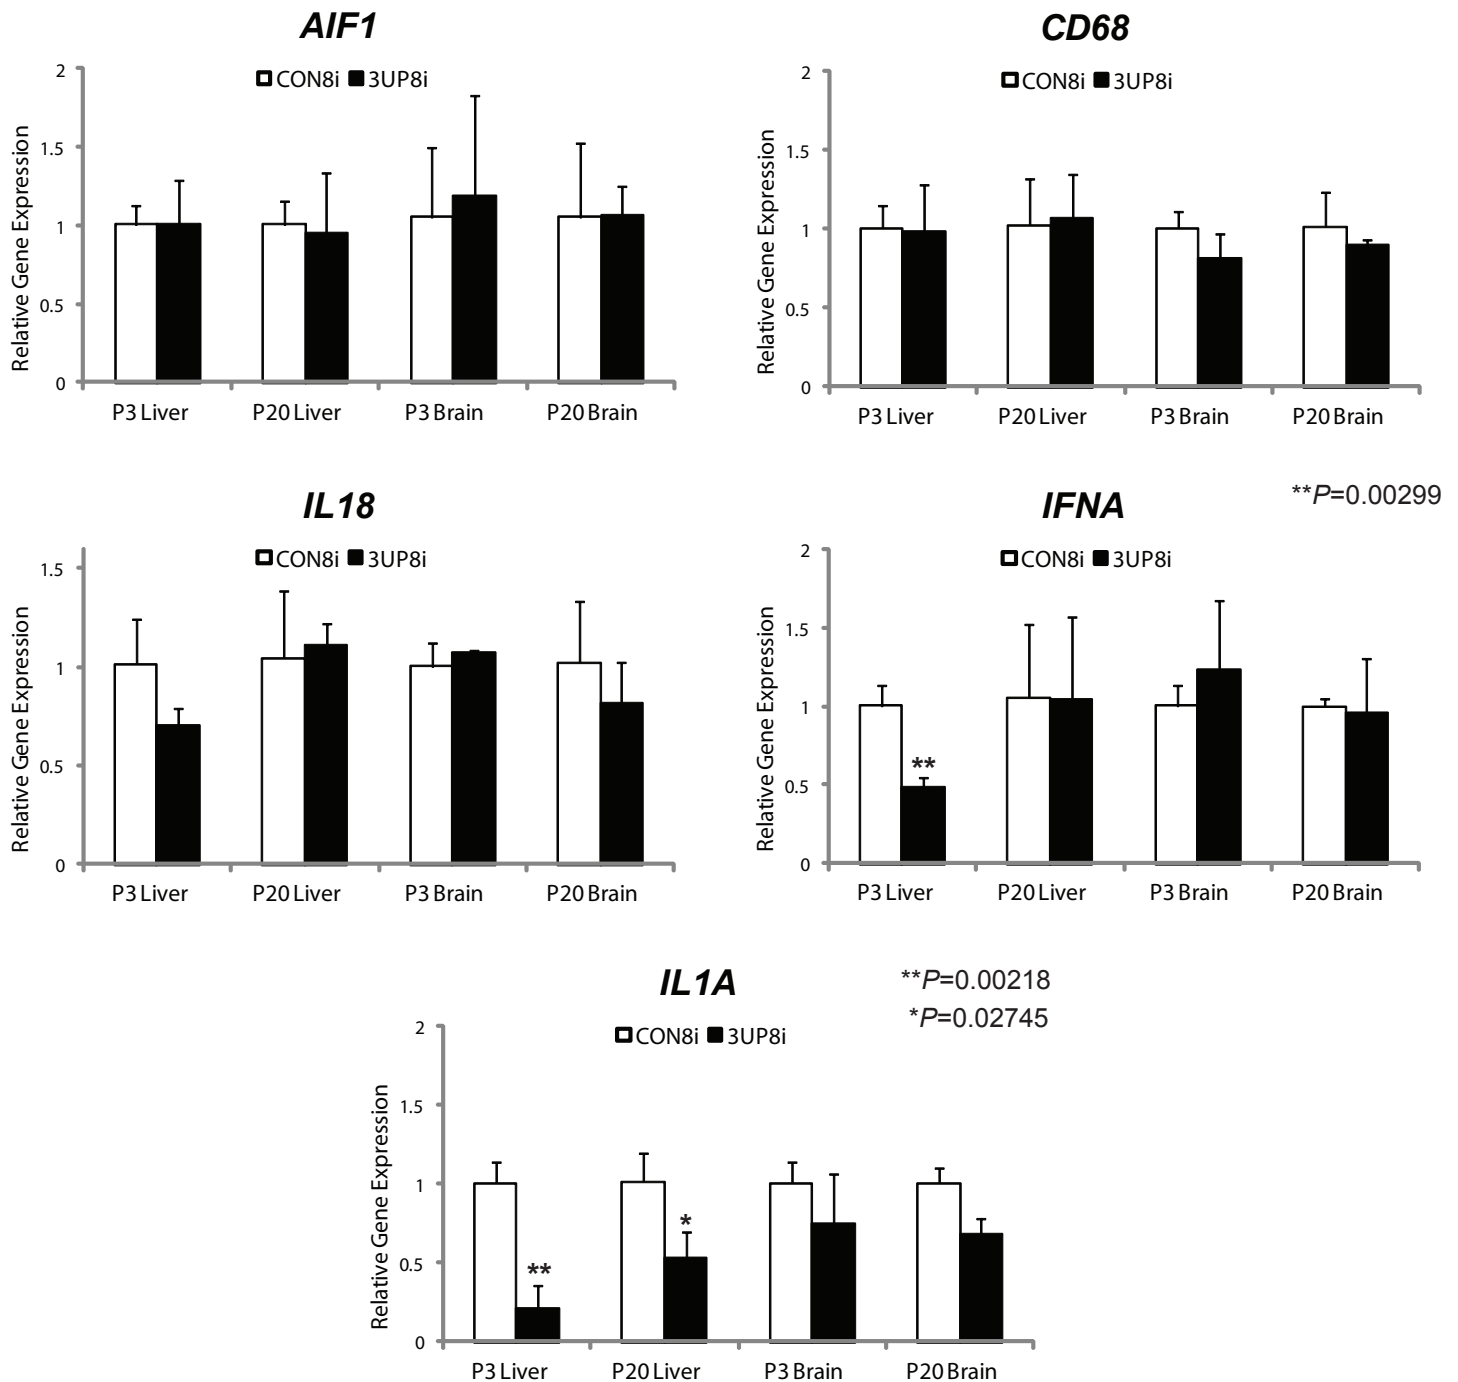

**Figure S4** 3UP8i ASO does not increase expression of several inflammation-related genes.

Mice were treated with one dose of 80  $\mu\text{g/g}$  body weight of 3UP8i or mismatch control (CON8i) on either P1 and P2 or P18 and P19 and subsequently sacrificed on P3 or P20. Liver and brain were harvested and RNA extracted from the tissue and analyzed via qRT-PCR for the expression of *AIF1*, *CD68*, *IL18*, *IFNA*, and *IL1A*. Relative gene expression was calculated using the formula  $2^{-\Delta\Delta\text{Ct}}$ ; the geometric mean of two reference genes—glyceraldehyde-3-phosphatase (*Gapdh*) and hypoxanthine phosphoribosyltransferase 1 (*Hprt*)—were used to calculate  $\Delta\Delta\text{Ct}$ .

Values are expressed as mean  $\pm$  standard deviation (n=2 or 3 per time point). Statistical analysis was performed with Student's *t*-test, and the values indicated in graph.
