# Supplementary material for: A Short Antisense Oligonucleotide Ameliorates Symptoms of Severe Mouse Models of Spinal Muscular Atrophy
Source: PubMed Central journal article supplement — Mol Ther Nucleic Acids. 2014 Jul 8;3(7):e174–. doi: 10.1038/mtna.2014.23 (PMC4121513; doi:10.1038/mtna.2014.23), 2014-07-08
Supplement: mtna201423x5.pdf [file mtna201423x5.pdf]

Table S1

| Study-specific Designation | Common Name          | Jax #              | SMN2 Copy # | SMA genotype                                                        | Breeding Strategy                                                                                           | Median survival untreated SMA | Primary outcome measures  | Secondary outcome measures | Reference                                     | % SMA pups/litter |
|----------------------------|----------------------|--------------------|-------------|---------------------------------------------------------------------|-------------------------------------------------------------------------------------------------------------|-------------------------------|---------------------------|----------------------------|-----------------------------------------------|-------------------|
| 5058-Hemi-FVB/N            | Taiwanese Hemizygous | #005058            | 2           | $Tg(SMN2)2Hung^{tg/0}; Snn^{tm1Hung/tm1Hung}$                       | ♂: $Snn^{tm1Hung/Wt}$ (FVB/N)<br>X<br>♀: $Tg(SMN2)2Hung^{tg/tg}; Snn^{tm1Hung/tm1Hung}$                     | 9 days                        | Survival, righting reflex | Weight                     | Hsieh-Li et al., 2000; Gogliotti et al., 2010 | 50%               |
| 5058-Hemi-Hybrid           | N/A                  | #006146<br>#005058 | 2           | $Tg(SMN2)2Hung^{tg/0}; Snn^{tm1Hung/tm1.1Jme}$                      | ♂: $Snn^{tm1.1Jme/Wt}$ (C57BL/6J-congenic)<br>X<br>♀: $Tg(SMN2)2Hung^{tg/tg}; Snn^{tm1Hung/tm1Hung}$        | 22 days                       | Survival, Pedal edema     | Weight, ECG, NMJ Pathology | Current Study                                 | 50%               |
| 5058-Homozygous            | Taiwanese Homozygous | #005058            | 4           | $Tg(SMN2)2Hung^{tg/0}; Tg(SMN2)2Hung^{tg/0}; Snn^{tm1Hung/tm1Hung}$ | ♂: $Tg(SMN2)2Hung^{tg/tg}; Snn^{tm1Hung/tm1Hung}$<br>X<br>♀: $Tg(SMN2)2Hung^{tg/tg}; Snn^{tm1Hung/tm1Hung}$ | WT survival                   | Protein and RNA Analyses  | N/A                        | Hsieh-Li et al., 2000; Gogliotti et al., 2010 | 100%              |

**Table S1** SMA models utilized in this study. The table outlines the 3 SMA mouse models used in the present study, including the various nomenclatures, genotype, breeding strategy, median survival, and outcome measures of each mouse strain.
